# Supplementary material
Source: Research Square preprint supplement (doi:10.21203/rs.3.rs-9682205/v1)
Supplement: Supplementary file 1 [file a75172d36d6afa46bffa9fbc.docx]

**Supplemental Table 1:** Unspecified Diabetes Mellitus with Peripheral Circulatory Complications related Deaths, Stratified by Sex and Race, in Adults in the United States, 1999 to 2023.

| **Year** | **Overall** | **Women** | **Men** | **NH American Indian or Alaska Native** | **NH Asian or Pacific Islander** | **NH Black or African American** | **NH White** | **Hispanic or Latino** | **Population** |
| --- | --- | --- | --- | --- | --- | --- | --- | --- | --- |
| 1999 | 7153 | 3719 | 3434 | 69 | 89 | 1526 | 5469 | 573 | 2.79E+08 |
| 2000 | 10676 | 5247 | 5429 | 72 | 180 | 2218 | 8206 | 897 | 2.81E+08 |
| 2001 | 10821 | 5411 | 5410 | 102 | 167 | 2266 | 8286 | 884 | 2.85E+08 |
| 2002 | 10526 | 5218 | 5308 | 90 | 192 | 2242 | 8002 | 951 | 2.88E+08 |
| 2003 | 10576 | 5145 | 5431 | 108 | 201 | 2237 | 8030 | 1007 | 2.90E+08 |
| 2004 | 10394 | 5102 | 5292 | 100 | 213 | 2254 | 7827 | 968 | 2.93E+08 |
| 2005 | 10259 | 4838 | 5421 | 88 | 214 | 2139 | 7818 | 950 | 2.96E+08 |
| 2006 | 8720 | 4032 | 4688 | 77 | 179 | 1753 | 6711 | 870 | 2.98E+08 |
| 2007 | 8137 | 3693 | 4444 | 88 | 169 | 1671 | 6209 | 774 | 3.01E+08 |
| 2008 | 7688 | 3475 | 4213 | 77 | 151 | 1464 | 5996 | 727 | 3.04E+08 |
| 2009 | 7317 | 3207 | 4110 | 59 | 163 | 1412 | 5683 | 693 | 3.07E+08 |
| 2010 | 7149 | 3040 | 4109 | 68 | 130 | 1371 | 5580 | 710 | 3.09E+08 |
| 2011 | 7592 | 3248 | 4344 | 81 | 132 | 1491 | 5888 | 787 | 3.12E+08 |
| 2012 | 7614 | 3216 | 4398 | 92 | 165 | 1386 | 5971 | 779 | 3.14E+08 |
| 2013 | 6292 | 2621 | 3671 | 59 | 125 | 1146 | 4962 | 571 | 3.16E+08 |
| 2014 | 6325 | 2564 | 3761 | 61 | 122 | 1113 | 5029 | 619 | 3.19E+08 |
| 2015 | 6337 | 2515 | 3822 | 68 | 108 | 1120 | 5041 | 633 | 3.21E+08 |
| 2016 | 6099 | 2396 | 3703 | 68 | 126 | 1061 | 4844 | 606 | 3.23E+08 |
| 2017 | 5929 | 2337 | 3592 | 62 | 131 | 1029 | 4707 | 631 | 3.26E+08 |
| 2018 | 5868 | 2227 | 3641 | 65 | 132 | 1013 | 4658 | 601 | 3.27E+08 |
| 2019 | 5988 | 2344 | 3644 | 80 | 127 | 1066 | 4715 | 600 | 3.28E+08 |
| 2020 | 7127 | 2712 | 4415 | 71 | 150 | 1405 | 5501 | 744 | 3.29E+08 |
| 2021 | 7096 | 2688 | 4408 | 88 | 103 | 1254 | 4873 | 718 | 3.32E+08 |
| 2022 | 6298 | 2341 | 3957 | 57 | 89 | 1147 | 4361 | 584 | 3.33E+08 |
| 2023 | 5837 | 2197 | 3640 | 53 | 89 | 996 | 4016 | 619 | 3.35E+08 |
| **Total** | 193818 | 85533 | 108285 | 1903 | 3647 | 37780 | 148383 | 18496 | 7.75E+09 |

***NH = Non hispanic**

**Supplemental Table 2:** Unspecified Diabetes Mellitus with Peripheral Circulatory Complications related Deaths, Stratified by Place of Death, in Adults in the United States, 1999 to 2023.

| **Place of Death** | **Deaths (1999-2020)** | **Deaths (2021-2023)** | **Total** | **Percentage** |
| --- | --- | --- | --- | --- |
| Medical Facility - Inpatient | 73170 | 6396 | 79566 | **41.00%** |
| Medical Facility - Outpatient or ER | 10729 | 1212 | 11941 | **6.20%** |
| Medical Facility - Dead on Arrival | 891 | 52 | 943 | **0.50%** |
| Medical Facility - Status unknown | 216 | 0.0001 | 216.0001 | **0.10%** |
| Total (Medical Facility) | 85006 | 7660.0001 | 92666.0001 | **47.8%** |
| Decedent's home | 33724 | 5721 | 39445 | **20.40%** |
| Hospice facility | 5566 | 1593 | 7159 | **3.70%** |
| Nursing home/long term care | 45032 | 3647 | 48679 | **25.10%** |
| Other | 4798 | 609 | 5407 | **2.80%** |
| Place of death unknown | 461 | 0.0001 | 461.0001 | **0.20%** |
|  | 174587 | 19230 | 193817 | **100.00%** |

**Supplemental Table 3:** Annual percent change (APC) of Unspecified Diabetes Mellitus with Peripheral Circulatory Complications Age-Adjusted Mortality Rates per 100,000 in Adults in the United States, 1999 to 2023.

| **Year Interval** | **APC (95% CI)** |
| --- | --- |
| **Overall** |  |
| 1999-2001 | 17.5264(4.0448-30.9467) |
| 2001-2016 | -6.3363(-10.5355- -5.7093) |
| 2016-2023 | -0.1292(-4.5312-16.4572) |
| **Men** |  |
| 1999- 2018 | -4.5857(-5.577- -3.9711) |
| 2018- 2021 | 5.9207(0.7832-9.3506) |
| 2021- 2023 | -11.8484(-16.8887- -4.1077) |
| **Women** |  |
| 1999- 2001 | 17.0501(5.1526-29.462) |
| 2001- 2016 | -7.4720(-11.1566- -6.8558) |
| 2016-2023 | -0.5776(-5.4608-17.2186) |
| **NH Black or African American** |  |
| 1999- 2001 | 20.7038(0.5527-42.5814) |
| 2001- 2016 | -8.3721(-14.0261- -7.5062) |
| 2016- 2023 | 0.0049(-5.1962-17.1195) |
| **Asian or Pacific Islander** |  |
| 1999-2002 | 11.8836(-6.3502-58.6648) |
| 2002-2021 | -9.8334(-14.5096- -9.3689) |
| 2021-2023 | -0.0009(-0.1463-0.1364) |
| **NH White** |  |
| 1999- 2001 | 17.0638(4.2948-28.8823) |
| 2001- 2014 | -5.9376(-10.2153- -5.1978) |
| 2014-2023 | -1.2316(-3.8728-8.8378) |
| **American Indian or Alaska Native** |  |
| 1999-2018 | -6.3625(-17.5122-11.1704) |
| 2018-2023 | 6.7413(-5.7865-43.0316) |
| **Hispanic or Latino** |  |
| 1999- 2003 | 4.7502(-1.0956-18.9071) |
| 2003- 2008 | -12.1674(-18.3615- -8.2182) |
| 2008- 2023 | -5.9697(-7.3355- -0.4044) |
| **Metropolitan areas** |  |
| 1999-2001 | 16.1388(0.1173-29.233) |
| 2001-2020 | -6.2118(-7.5654- -5.5883) |
| **Non-metropolitan areas** |  |
| 1999-2001 | 18.2270(88.2477-29.2575) |
| 2001-2018 | -4.7140(-6.5443- -4.3055) |
| 2018-2023 | 11.2486(-3.365-19.1764) |
| **Northeast** |  |
| 1999-2017 | -5.6545(-13.0496- -2.5507) |
| 2017-2020 | 4.9884(2.5729-7.0425) |
| 2020-2023 | -10.2070(-12.544- -8.3331) |
| **Midwest** |  |
| 1999-2018 | -4.3400(-10.2993- -2.4138) |
| 2018-2021 | 6.4044(1.7657-9.5491) |
| 2021-2023 | -12.9277(18.7307- -6.1544) |
| **South** |  |
| 1999-2018 | -4.4140(-5.2871- -3.8102) |
| 2018-2021 | 8.7698(3.151-12.3638) |
| 2021-2023 | -10.9209(-16.0845- -3.4109) |
| **West** |  |
| 1999-2015 | 0.565(-1.7331-8.3462) |
| 2015-2018 | -8.9667(-11.0934- -6.1809) |
| 2018-2021 | 2.4943(-0.2539-4.9765) |
| 2021-2023 | -17.7780(-22.4027- -14.1588) |

**Supplemental Table 4:** Overall and Sex Stratified Unspecified Diabetes Mellitus with Peripheral Circulatory Complications Related Age-Adjusted Mortality Rates per 100,000 in Adults in the United States, 1999 to 2023.

| **Year** | **Overall** | **Men** | **Women** |
| --- | --- | --- | --- |
| 1999 | 2.6(2.5-2.7) | 3.1(3-3.2) | 2.3(2.2-2.4) |
| 2000 | 3.9(3.8-3.9) | 4.9(4.7-5) | 3.2(3.1-3.3) |
| 2001 | 3.9(3.8-3.9) | 4.7(4.6-4.9) | 3.2(3.2-3.3) |
| 2002 | 3.7(3.6-3.8) | 4.6(4.4-4.7) | 3.1(3-3.2) |
| 2003 | 3.6(3.6-3.7) | 4.5(4.4-4.7) | 3(2.9-3.1) |
| 2004 | 3.5(3.5-3.6) | 4.4(4.2-4.5) | 2.9(2.8-3) |
| 2005 | 3.4(3.3-3.5) | 4.3(4.2-4.5) | 2.7(2.7-2.8) |
| 2006 | 2.8(2.8-2.9) | 3.7(3.6-3.8) | 2.2(2.2-2.3) |
| 2007 | 2.6(2.5-2.7) | 3.4(3.3-3.5) | 2(1.9-2.1) |
| 2008 | 2.4(2.4-2.5) | 3.2(3.1-3.3) | 1.9(1.8-1.9) |
| 2009 | 2.2(2.2-2.3) | 3(2.9-3.1) | 1.7(1.6-1.8) |
| 2010 | 2.2(2.1-2.2) | 2.9(2.8-3) | 1.6(1.5-1.6) |
| 2011 | 2.2(2.2-2.3) | 3(2.9-3.1) | 1.7(1.6-1.7) |
| 2012 | 2.2(2.1-2.2) | 3(2.9-3) | 1.6(1.5-1.7) |
| 2013 | 1.8(1.7-1.8) | 2.4(2.3-2.5) | 1.3(1.2-1.3) |
| 2014 | 1.7(1.7-1.8) | 2.4(2.3-2.5) | 1.2(1.2-1.3) |
| 2015 | 1.7(1.6-1.7) | 2.3(2.3-2.4) | 1.2(1.1-1.2) |
| 2016 | 1.6(1.5-1.6) | 2.2(2.1-2.3) | 1.1(1-1.1) |
| 2017 | 1.5(1.5-1.5) | 2.1(2-2.2) | 1(1-1.1) |
| 2018 | 1.4(1.4-1.5) | 2.1(2-2.1) | 1(0.9-1) |
| 2019 | 1.4(1.4-1.5) | 2(1.9-2.1) | 1(1-1.1) |
| 2020 | 1.7(1.6-1.7) | 2.4(2.3-2.5) | 1.1(1.1-1.2) |
| 2021 | 1.7(1.7-1.8) | 2.4(2.3-2.5) | 1.2(1.1-1.2) |
| 2022 | 1.5(1.4-1.5) | 2.1(2-2.1) | 1(0.9-1) |
| 2023 | 1.3(1.3-1.4) | 1.9(1.8-1.9) | 0.9(0.9-1) |

**Supplemental Table 5:** Unspecified Diabetes Mellitus with Peripheral Circulatory Complications Related Age-Adjusted Mortality Rates per 100,000 and Crude rate, Stratified by Age-Groups in Adults in the United States, 1999 to 2023.

|  | **Age 25-44 Years** | **Age 45-64 Years** | **Age 65-85+ years** |
| --- | --- | --- | --- |
| **Year** | **Age Adjusted Rate** | **Age Adjusted Rate** | **Age Adjusted Rate** |
| 1999 | 0.1(0.1-0.1) | 2(1.9-2.1) | 16.8(16.4-17.2) |
| 2000 | 0.2(0.1-0.2) | 3.2(3-3.3) | 24.7(24.2-25.2) |
| 2001 | 0.2(0.1-0.2) | 3(2.8-3.1) | 24.9(24.4-25.4) |
| 2002 | 0.2(0.1-0.2) | 2.8(2.6-2.9) | 23.9(23.4-24.4) |
| 2003 | 0.2(0.1-0.2) | 2.8(2.7-3) | 23.4(22.9-23.9) |
| 2004 | 0.2(0.2-0.2) | 2.7(2.6-2.8) | 22.8(22.3-23.3) |
| 2005 | 0.1(0.1-0.1) | 2.6(2.5-2.7) | 22.1(21.6-22.6) |
| 2006 | 0.1(0.1-0.1) | 2.2(2.1-2.3) | 18.3(17.8-18.7) |
| 2007 | 0.1(0.1-0.1) | 2(1.9-2.1) | 16.8(16.4-17.2) |
| 2008 | 0.1(0.1-0.1)  0.1(0.1-0.1) | 1.8(1.7-1.9) | 15.6(15.2-16) |
| 2009 | 0.1(0.1-0.1) | 1.7(1.6-1.8) | 14.5(14.1-14.9) |
| 2010 | 0.1(0.1-0.1) | 1.7(1.6-1.8) | 13.9(13.5-14.3) |
| 2011 | 0.1(0.1-0.1) | 1.7(1.6-1.7) | 14.4(14.1-14.8) |
| 2012 | 0.1(0.1-0.1) | 1.6(1.5-1.7) | 14.1(13.7-14.4) |
| 2013 | 0.1(0.1-0.1) | 1.3(1.2-1.3) | 11.5(11.1-11.8) |
| 2014 | 0.1(0.001-0.1) | 1.2(1.2-1.3) | 11.2(10.9-11.6) |
| 2015 | 0.1(0.001-0.1) | 1.3(1.2-1.3) | 10.9(10.6-11.2) |
| 2016 | 0.1(0.001-0.1) | 1.3(1.3-1.4) | 10.1(9.8-10.4) |
| 2017 | 0.1(0.001-0.1) | 1.3(1.2-1.4) | 9.5(9.3-9.8) |
| 2018 | 0.1(0.001-0.1) | 1.2(1.1-1.3) | 9.2(8.9-9.4) |
| 2019 | 0.1(0.001-0.1) | 1.2(1.2-1.3) | 9.1(8.8-9.4) |
| 2020 | 0.1(0.001-0.1) | 1.5(1.4-1.6) | 10.5(10.3-10.8) |
| 2021 | 0.1(0.1-0.1) | 1.5(1.5-1.6) | 10.6(10.3-10.9) |
| 2022 | 0.1(0.0001-0.1) | 1.2(1.2-1.3) | 9.2(9-9.5) |
| 2023 | 0.1(0.0001-0.1) | 1.2(1.1-1.3) | 8.4(8.2-8.7) |

**Supplemental Table 6**: Unspecified Diabetes Mellitus with Peripheral Circulatory Complications related Deaths, Stratified by Race, in Adults in the United States, 1999 to 2023.

| **Year** | **NH White** | **NH Black or African American** | **NH American Indian or Alaska Native** | **Hispanic or Latino** | **NH Asian or Pacific Islander** |
| --- | --- | --- | --- | --- | --- |
| 1999 | 2.3(2.2-2.3) | 6.6(6.3-7) | 5(3.8-6.4) | 4.2(3.9-4.6) | 1.5(1.2-1.8) |
| 2000 | 3.3(3.3-3.4) | 9.5(9.1-9.9) | 4.9(3.8-6.2) | 6.4(6-6.9) | 2.7(2.3-3.2) |
| 2001 | 3.3(3.3-3.4) | 9.5(9.1-9.9) | 7(5.6-8.4) | 5.9(5.5-6.3) | 2.4(2-2.8) |
| 2002 | 3.2(3.1-3.2) | 9.3(8.9-9.7) | 5.5(4.3-6.8) | 6.1(5.7-6.3) | 2.6(2.2-2.9) |
| 2003 | 3.1(3.1-3.2) | 9.1(8.7-9.4) | 6.2(5-7.5) | 6.1(5.7-6.5) | 2.5(2.2-2.9) |
| 2004 | 3(3-3.1) | 9(8.6-9.3) | 6(4.7-7.3) | 5.6(5.2-5.9) | 2.5(2.2-2.9) |
| 2005 | 3(2.9-3) | 8.2(7.9-8.6) | 4.4(3.5-5.5) | 5.2(4.8-5.5) | 2.4(2.1-2.8) |
| 2006 | 2.5(2.4-2.6) | 6.6(6.3-6.9) | 4.1(3.2-5.3) | 4.4(4.1-4.7) | 1.9(1.6-2.2) |
| 2007 | 2.3(2.2-2.3) | 6.1(5.8-6.4) | 4.6(3.6-5.8) | 3.8(3.5-4) | 1.7(1.5-2) |
| 2008 | 2.1(2.1-2.2) | 5.3(5-5.5) | 3.7(2.9-4.7) | 3.3(3.1-3.6) | 1.4(1.2-1.7) |
| 2009 | 2(2-2.1) | 4.9(4.6-5.1) | 2.7(2-3.5) | 3.1(2.8-3.3) | 1.4(1.2-1.7) |
| 2010 | 1.9(1.9-2) | 4.7(4.4-4.9) | 3(2.3-3.9) | 3(2.8-3.2) | 1.1(0.9-1.3) |
| 2011 | 2(2-2.1) | 4.8(4.6-5.1) | 3.4(2.6-4.2) | 3.1(2.9-3.4) | 1(0.9-1.2) |
| 2012 | 2(1.9-2) | 4.3(4.1-4.6) | 3.5(2.8-4.4) | 2.9(2.7-3.1) | 1.2(1-1.4) |
| 2013 | 1.6(1.6-1.7) | 3.5(3.3-3.7) | 2.3(1.7-3) | 2.1(1.9-2.3) | 0.9(0.7-1) |
| 2014 | 1.6(1.5-1.6) | 3.2(3-3.4) | 2.3(1.7-2.9) | 2.1(1.9-2.3) | 0.8(0.7-1) |
| 2015 | 1.6(1.5-1.6) | 3.1(2.9-3.3) | 2.3(1.8-3) | 2(1.9-2.2) | 0.7(0.5-0.8) |
| 2016 | 1.5(1.4-1.5) | 2.9(2.7-3) | 2.3(1.7-2.90 | 1.8(1.7-2) | 0.7(0.6-0.8) |
| 2017 | 1.4(1.4-1.5) | 2.7(2.5-2.8) | 1.9(1.5-2.5) | 1.8(1.7-2) | 0.7(0.6-0.8) |
| 2018 | 1.4(1.3-1.4) | 2.5(2.4-2.7) | 1.7(1.3-2.2) | 1.6(1.5-1.8) | 0.7(0.6-0.8) |
| 2019 | 1.4(1.3-1.4) | 2.6(2.4-2.7) | 2.3(1.8-2.9) | 1.6(1.5-1.7) | 0.6(0.5-0.7) |
| 2020 | 1.6(1.5-1.6) | 3.3(3.1-3.5) | 1.8(1.4-2.3) | 1.9(1.7-2) | 0.7(0.6-0.8) |
| 2021 | 1.6(1.5-1.6) | 3.1(3-3.3) | 3.8(3-4.7) | 1.7(1.6-1.9) | 0.5(0.4-0.6) |
| 2022 | 1.4(1.3-1.4) | 2.8(2.6-3) | 2.2(1.6-2.9) | 1.4(1.3-1.5) | 0.4(0.3-0.5) |
| 2023 | 1.3(1.2-1.3) | 2.4(2.2-2.6) | 2(1.5-2.7) | 1.4(1.3-1.5) | 0.4(0.3-0.5) |

*NH = non-Hispanic.

**Supplemental Table 7**: Unspecified Diabetes Mellitus with Peripheral Circulatory Complications related Deaths, Stratified by States, in Adults in the United States, 1999 to 2023.

|  | **Age-**   **Adjusted Rate (95% CI)** |  |
| --- | --- | --- |
| **State** | **1999-2020 Age-Adjusted Rate (95% CI)** | **2021-2023 Age-Adjusted Rate (95% CI)** |
| Utah | 1.3(1.2-1.4) | 1.1(0.9-1.3) |
| Wyoming | 1.5(1.3-1.7) | 0.9(0.4-1.2) |
| Alaska | 1.9(1.6-2.2) | 0.6(0.3-1.1) |
| Idaho | 1.5(1.4-1.6) | 1(0.8-1.3) |
| Nevada | 1.1(1.1-1.2) | 1.5(1.3-1.7) |
| Colorado | 1.5(1.5-1.6) | 1.3(1.1-1.4) |
| Arizona | 1.5(1.4-1.5) | 1.4(1.2-1.5) |
| California | 2.4(2.3-2.4) | 0.5(0.5-0.6) |
| Connecticut | 2.1(2-2.2) | 0.8(0.7-0.9) |
| Alabama | 2.2(2.1-2.3) | 0.9(0.7-1) |
| Massachusetts | 2.1(2.1-2.2) | 1(0.8-1.1) |
| Florida | 1.7(1.7-1.7) | 1.5(1.4-1.5) |
| Iowa | 1.8(1.7-1.9) | 1.5(1.3-1.7) |
| Kansas | 1.8(1.7-1.9) | 1.5(1.3-1.8) |
| New Mexico | 2.1(2-2.2) | 1.2(1-1.5) |
| Georgia | 2.1(2.1-2.2) | 1.3(1.1-1.4) |
| Illinois | 2.2(2.1-2.2) | 1.2(1.1-1.3) |
| Hawaii | 2.6(2.4-2.8) | 0.9(0.7-1.2) |
| New York | 2(2-2.1) | 1.5(1.4-1.6) |
| Arkansas | 2(1.9-2.1) | 1.6(1.4-1.8) |
| Michigan | 2.2(2.1-2.2) | 1.4(1.3-1.5) |
| Montana | 1.9(1.7-2.1) | 1.7(1.3-2.1) |
| Minnesota | 2.2(2.2-2.3) | 1.5(1.4-1.7) |
| Missouri | 2.2(2.1-2.2) | 1.5(1.4-1.7) |
| New Hampshire | 2.3(2.1-2.4) | 1.4(1.1-1.7) |
| North Dakota | 2.4(2.1-2.6) | 1.3(0.9-1.8) |
| Maine | 2.3(2.2-2.5) | 1.5(1.2-1.8) |
| Oregon | 2.2(2.1-2.3) | 1.6(1.4-1.8) |
| Virginia | 2.2(2.1-2.2) | 1.6(1.4-1.7) |
| Washington | 2.3(2.2-2.3) | 1.5(1.4-1.7) |
| Nebraska | 2.1(2-2.3) | 1.8(1.5-2.1) |
| Pennsylvania | 2.5(2.5-2.6) | 1.4(1.3-1.5) |
| New Jersey | 2.7(2.6-2.7) | 1.3(1.2-1.4) |
| Indiana | 2.4(2.3-2.5) | 1.7(1.5-1.9) |
| Wisconsin | 2.4(2.3-2.5) | 1.9(1.7-2) |
| South Dakota | 2.4(2.2-2.6) | 2(1.5-2.5) |
| Tennessee | 2.7(2.6-2.8) | 1.9(1.7-2.1) |
| Kentucky | 2.3(2.2-2.4) | 2.4(2.2-2.6) |
| Oklahoma | 2.6(2.5-2.7) | 2.2(2-2.5) |
| Ohio | 3.2(3.1-3.2) | 1.7(1.5-1.8) |
| Louisiana | 2.5(2.4-2.5) | 2.5(2.3-2.8) |
| North Carolina | 3.2(3.2-3.3) | 1.8(1.7-1.9) |
| West Virginia | 2.9(2.8-3.1) | 2.1(1.7-2.4) |
| Texas | 3.1(3.1-3.2) | 2(1.9-2.1) |
| Delaware | 2.2(2-2.4) | 3(2.5-3.5) |
| Rhode Island | 3.1(2.9-3.4) | 2.5(2-2.9) |
| Vermont | 3.5(3.3-3.8) | 2.1(1.6-2.7) |
| Maryland | 3.6(3.5-3.7) | 2.5(2.3-2.7) |
| Mississippi | 3.1(3-3.3) | 3.1(2.8-3.4) |
| South Carolina | 3(2.9-3.2) | 3.3(3-3.5) |
| District of Columbia | 5(4.6-5.3) | 3(2.3-3.9) |

**Supplemental Table 8**: Unspecified Diabetes Mellitus with Peripheral Circulatory Complications related Deaths, Stratified by Census Region, in Adults in the United States, 1999 to 2023.

| **Census Region** | **Year** | **Age-Adjusted Rate (95% CI)** |
| --- | --- | --- |
| Northeast | 1999 | 2.4(2.3-2.6) |
| Northeast | 2000 | 3.8(3.7-4) |
| Northeast | 2001 | 3.8(3.7-4) |
| Northeast | 2002 | 3.7(3.5-3.8) |
| Northeast | 2003 | 3.4(3.2-3.5) |
| Northeast | 2004 | 3.2(3.1-3.4) |
| Northeast | 2005 | 3.3(3.1-3.4) |
| Northeast | 2006 | 2.7(2.6-2.8) |
| Northeast | 2007 | 2.5(2.3-2.6) |
| Northeast | 2008 | 2.2(2.1-2.3) |
| Northeast | 2009 | 2.1(2-2.2) |
| Northeast | 2010 | 2.2(2.1-2.3) |
| Northeast | 2011 | 2.2(2.1-2.4) |
| Northeast | 2012 | 2.1(2-2.2) |
| Northeast | 2013 | 1.7(1.6-1.8) |
| Northeast | 2014 | 1.8(1.7-1.9) |
| Northeast | 2015 | 1.6(1.5-1.7) |
| Northeast | 2016 | 1.5(1.5-1.6) |
| Northeast | 2017 | 1.5(1.4-1.5) |
| Northeast | 2018 | 1.4(1.3-1.5) |
| Northeast | 2019 | 1.5(1.4-1.6) |
| Northeast | 2020 | 1.7(1.6-1.7) |
| Northeast | 2021 | 1.5(1.5-1.6) |
| Northeast | 2022 | 1.3(1.2-1.4) |
| Northeast | 2023 | 1.2(1.1-1.3) |
| Midwest | 1999 | 2.3(2.2-2.4) |
| Midwest | 2000 | 3.7(3.6-3.9) |
| Midwest | 2001 | 3.7(3.6-3.8) |
| Midwest | 2002 | 3.4(3.2-3.5) |
| Midwest | 2003 | 3.6(3.5-3.8) |
| Midwest | 2004 | 3.4(3.3-3.5) |
| Midwest | 2005 | 3.3(3.2-3.4) |
| Midwest | 2006 | 2.8(2.7-2.9) |
| Midwest | 2007 | 2.6(2.5-2.8) |
| Midwest | 2008 | 2.5(2.4-2.6) |
| Midwest | 2009 | 2.4(2.3-2.5) |
| Midwest | 2010 | 2.2(2.1-2.3) |
| Midwest | 2011 | 2.2(2.1-2.3) |
| Midwest | 2012 | 2.2(2.1-2.3) |
| Midwest | 2013 | 1.8(1.7-1.9) |
| Midwest | 2014 | 1.8(1.7-1.9) |
| Midwest | 2015 | 1.8(1.7-1.9) |
| Midwest | 2016 | 1.6(1.5-1.7) |
| Midwest | 2017 | 1.6(1.5-1.6) |
| Midwest | 2018 | 1.5(1.4-1.6) |
| Midwest | 2019 | 1.4(1.3-1.5) |
| Midwest | 2020 | 1.8(1.7-1.8) |
| Midwest | 2021 | 1.8(1.7-1.8) |
| Midwest | 2022 | 1.5(1.4-1.5) |
| Midwest | 2023 | 1.4(1.3-1.4) |
| South | 1999 | 3.3(3.2-3.4) |
| South | 2000 | 4(3.8-4.1) |
| South | 2001 | 4(3.9-4.1) |
| South | 2002 | 4(3.8-4.1) |
| South | 2003 | 3.8(3.7-3.9) |
| South | 2004 | 3.8(3.7-3.9) |
| South | 2005 | 3.6(3.5-3.7) |
| South | 2006 | 2.9(2.8-3) |
| South | 2007 | 2.7(2.6-2.8) |
| South | 2008 | 2.5(2.4-2.6) |
| South | 2009 | 2.4(2.3-2.5) |
| South | 2010 | 2.3(2.2-2.4) |
| South | 2011 | 2.3(2.2-2.4) |
| South | 2012 | 2.4(2.3-2.4) |
| South | 2013 | 1.9(1.9-2) |
| South | 2014 | 1.8(1.7-1.9) |
| South | 2015 | 1.9(1.8-1.9) |
| South | 2016 | 1.7(1.7-1.8) |
| South | 2017 | 1.7(1.6-1.7) |
| South | 2018 | 1.7(1.6-1.7) |
| South | 2019 | 1.7(1.6-1.8) |
| South | 2020 | 2(1.9-2.1) |
| South | 2021 | 2.1(2-2.2) |
| South | 2022 | 1.8(1.8-1.9) |
| South | 2023 | 1.7(1.6-1.8) |
| West | 1999 | 2(1.8-2.1) |
| West | 2000 | 3.8(3.7-4) |
| West | 2001 | 3.8(3.6-3.9) |
| West | 2002 | 3.6(3.4-3.7) |
| West | 2003 | 3.6(3.4-.3.8) |
| West | 2004 | 3.5(3.4-3.7) |
| West | 2005 | 3.3(3.2-3.5) |
| West | 2006 | 2.9(2.7-3) |
| West | 2007 | 2.4(2.3-2.6) |
| West | 2008 | 2.2(2.1-2.3) |
| West | 2009 | 1.9(1.8-2) |
| West | 2010 | 1.9(1.8-2) |
| West | 2011 | 2.1(2-2.2) |
| West | 2012 | 2(1.9-2.1) |
| West | 2013 | 1.4(1.4-1.5) |
| West | 2014 | 1.4(1.4-1.5) |
| West | 2015 | 1.4(1.3-1.4) |
| West | 2016 | 1.3(1.2-1.4) |
| West | 2017 | 1.2(1.2-1.3) |
| West | 2018 | 1.1(1-1.2) |
| West | 2019 | 1(1-1.1) |
| West | 2020 | 1.1(1.1-1.2) |
| West | 2021 | 1.2(1.1-1.2) |
| West | 2022 | 0.9(0.9-1) |
| West | 2023 | 0.8(0.7-0.9) |

**Supplemental Table 9**: Unspecified Diabetes Mellitus with Peripheral Circulatory Complications related Deaths, Stratified by Urban-Rural Classification in the United States, 1999 to 2020.

| **Age-Adjusted Rate (95% CI)** | | |
| --- | --- | --- |
| **Year** | **Metropolitan** | **Nonmetropolitan** |
| 1999 | 2.6(2.5-2.7) | 2.6(2.4-2.7) |
| 2000 | 4(3.9-4) | 3.4(3.2-3.5) |
| 2001 | 3.9(3.8-4) | 3.7(3.6-3.9) |
| 2002 | 3.7(3.7-3.8) | 3.5(3.3-3.7) |
| 2003 | 3.7(3.6-3.8) | 3.5(3.4-3.7) |
| 2004 | 3.6(3.5-3.7) | 3.4(3.3-3.6) |
| 2005 | 3.4(3.3-3.5) | 3.4(3.3-3.6) |
| 2006 | 2.8(2.8-2.9) | 2.9(2.7-3) |
| 2007 | 2.6(2.5-2.6) | 2.7(2.6-2.8) |
| 2008 | 2.3(2.3-2.4) | 2.7(2.5-2.8) |
| 2009 | 2.2(2.1-2.2) | 2.5(2.3-2.6) |
| 2010 | 2.1(2.1-2.2) | 2.3(2.2-2.4) |
| 2011 | 2.2(2.1-2.2) | 2.4(2.3-2.5) |
| 2012 | 2.1(2.1-2.2) | 2.4(2.3-2.5) |
| 2013 | 1.7(1.7-1.7) | 2(1.9-2.1) |
| 2014 | 1.7(1.6-1.7) | 1.9(1.8-2) |
| 2015 | 1.6(1.6-1.7) | 1.9(1.8-2) |
| 2016 | 1.5(1.5-1.6) | 2(1.9-2.1) |
| 2017 | 1.4(1.4-1.5) | 1.8(1.7-1.9) |
| 2018 | 1.4(1.4-1.4) | 1.7(1.6-1.8) |
| 2019 | 1.4(1.3-1.4) | 1.8(1.7-1.9) |
| 2020 | 1.6(1.6-1.6) | 2.1(2-2.2) |
